# Supplementary material for: Metal-ion responsive redoxpolyelectrolyte multilayers
Source: Royal Society of Chemistry journal article supplement (doi:10.1039/c0cc02738c), 2010-01-01
Supplement: c0cc02738c.pdf [file c0cc02738c.pdf]

# Supporting Information

## Metal-ion Responsive Redox Polyelectrolyte Multilayers

## **Experimental Section**

**Chemicals and Solutions.** 3-Mercapto-1-propanesulfonic acid sodium salt, MPS (Aldrich); Cysteamine (Aldrich); poly(acrylic acid) sodium salt, PAA (Aldrich, 35% in water Mw 100000); poly(allylamine) chloride salt, PAH (Aldrich Mw 56000) and poly(sodium vinyl-sulfonate), PVS (25 wt. % solution in water, Aldrich) were used as supplied. Other reagents were analytical grade and were used without further purification. Polyelectrolyte solutions were prepared with 18 M $\Omega$ .cm Milli-Q (Millipore) deionized water and their pH was adjusted to pH 7 (PAH-OsCN, PVS and PAH) or pH 4 (PAA-OsCN) using either HNO<sub>3</sub> or NaOH 0.1 M. The polyelectrolyte concentrations were 10 mM for PVS and PAH. The redox polymers PAH-OsCN and PAA-OsCN were adsorbed from 2 mM solutions, as determined from the UV-vis spectrum of working solution and the  $\epsilon_{MLCT}([\text{Os}(\text{CN})_5\text{py}]^{3-}) = 5460 \text{ M}^{-1} \text{ cm}^{-1}$ .

**Synthesis of PAH-OsCN.** The redox polyelectrolyte PAH-OsCN was prepared as described previously<sup>2</sup> from a pyridine modified poly(allylamine) (PAH-py) (prepared according refs. 2 and 3, see NMR spectrum in Figure 1S) and the complex K<sub>2</sub>[Os(CN)<sub>5</sub>NO].H<sub>2</sub>O, prepared and purified according to the literature<sup>1, 4, 5</sup>. The complex-substituted polymer was purified by dialysis against NaCl 0.5 M + HNO<sub>3</sub> 1 mM for 2 days and against MilliQ water for 5 days.

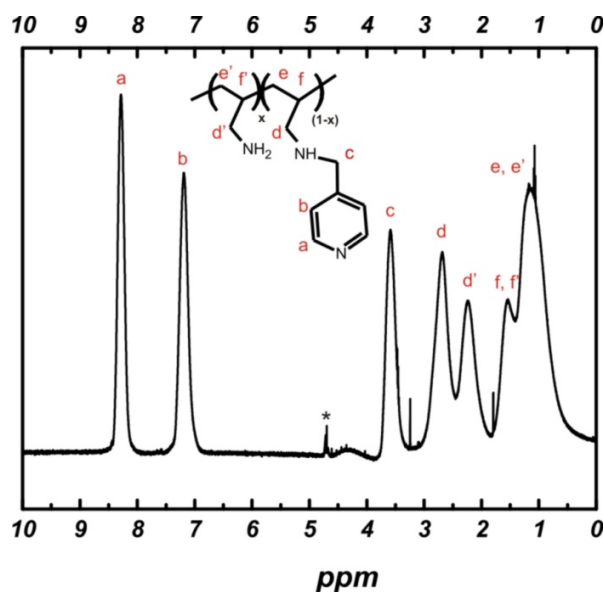

Figure 1S: <sup>1</sup>H NMR spectra of PAH-py. \* HDO/H<sub>2</sub>O (suppressed)

The identity of the product was analyzed by UV-VIS in solution, FTIR in KBr pellet and XPS (NMR was not performed because the freeze dried solid was insoluble in any available deuterated solvent). The FTIR spectrum (Figure 2S-A and 2S-B) shows a very intense band at 2035 cm<sup>-1</sup> that is absent in the PAH-py spectrum and can be assigned to the C≡N stretching mode in the reduced -Os(CN)<sub>5</sub> group. Both the PAH-OsCN and PAH-py shows a small band at 3060 cm<sup>-1</sup> and several bands in the range 1600-1200 cm<sup>-1</sup> (i.e. the band at 1414 cm<sup>-1</sup>) that can be assigned to pyridine aromatic C-H stretching mode and ring stretching vibrations, respectively<sup>6</sup>. The UV-vis spectra of PAH-OsCN (Figure 2S-C) shows the metal to ligand charge transfer (MLCT) band at 324 nm, close to the literature value for the complex [Os(CN)<sub>5</sub>py]<sup>3-</sup>, λ<sub>MLCT</sub> = 318 nm<sup>1</sup>. The XPS spectra (recorded for a (PAH-OsCN/PVS)<sub>8</sub>PAH-OsCN multilayer, see Figure 3S) shows well defined peaks in the Os 4f and N 1s regions. The N 1s peak can be deconvoluted into three peaks. The highest BE peak (402.3 eV) is assigned to protonated amino groups and pyridine groups<sup>7</sup>. Deprotonation of these groups decreases the BE, giving rise to the peak at 400.4 eV, which can be assigned to the convolution of unprotonated amino and pyridine moieties<sup>7</sup>. Finally the lowest BE peak

(398.3 eV) can be assigned to the CN ligand in the osmium complex<sup>8, 9</sup>. The atomic N(CN)/Os ratio determined from these spectra is 4.4, close to the expected value of 5.

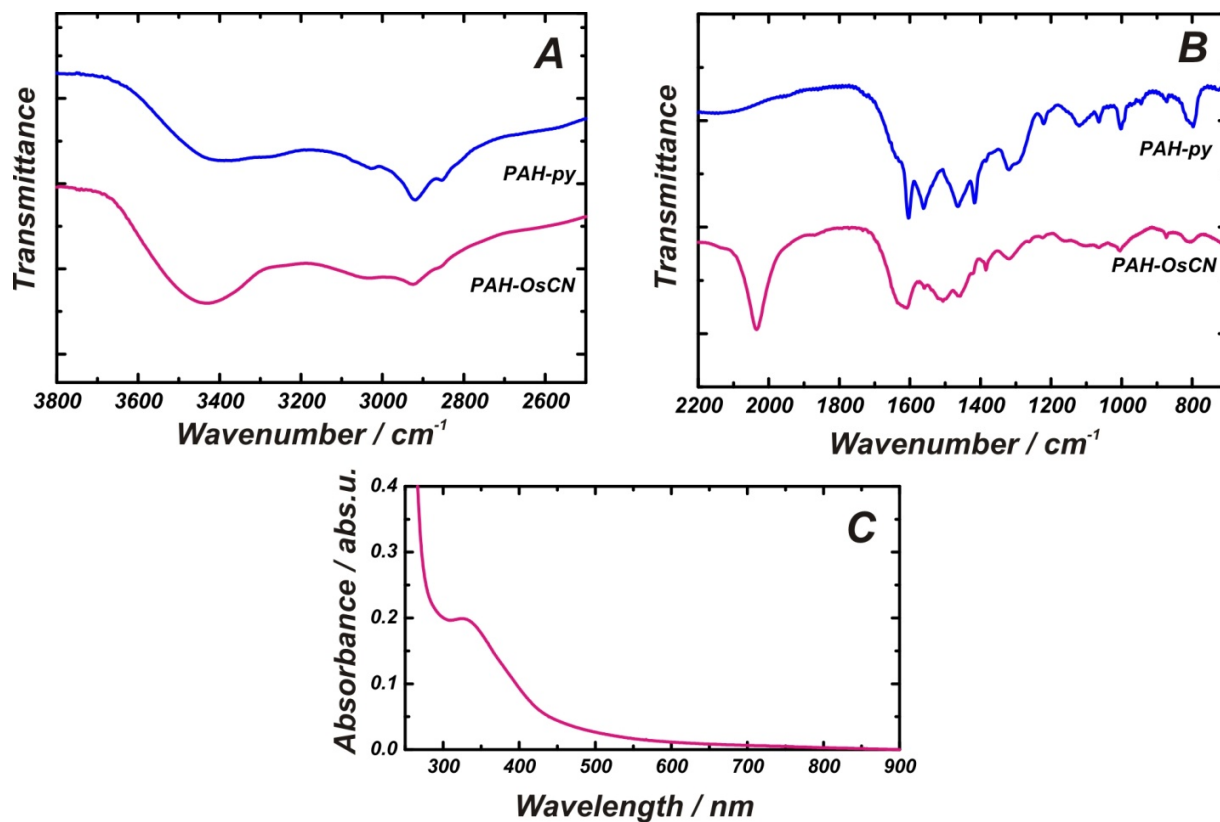

Figure 2S. Transmittance FTIR spectra in KBR pellet for PAH-py and PAH-OsCN in the 3800-2600 cm<sup>-1</sup> (A) and 2200-700 cm<sup>-1</sup> (B) regions. C. UV-vis spectra for a PAH-OsCN in solution.

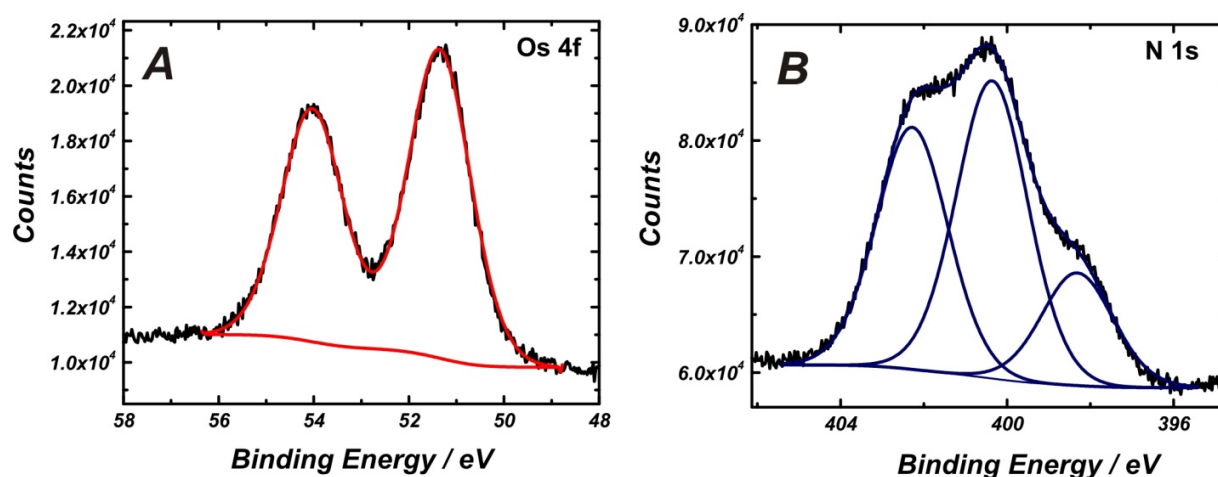

Figure 3S: XPS spectra for a (PAH-OsCN/PVS)<sub>8</sub>PAHOsCN in the Os 4f (A) and N 1s (B) regions.

### Synthesis of PAA-OsCN.

The osmium pentacyano modified poly(acrylic acid) was prepared from pyridine modified poly(acrylic acid) (PAA-py) and the complex  $K_2[Os(CN)_5NO] \cdot H_2O$ .

PAA-py was synthesized by mixing 200 mg of PAA sodium salt (2.1 mmol) dissolved in 10 ml of anhydrous N-Methyl-2-pyrrolidone (NMP) with 500 mg of N,N'-dicyclohexylcarbodiimide (DCC) and 300 mg of N-Hydroxysuccinimide (NHS) dissolved in 5 ml of anhydrous NMP. The mixture was heated at 60°C for 1 hour. After that period, the N,N'-dicyclohexylurea precipitate was filtered and 360  $\mu$ l of picolyamine (3.3 mmol) were added to the solution. The reaction was left to proceed overnight at 60°C, the final solution was diluted with water and purified by dialysis against MilliQ water for a week. The final product was analyzed by  $^1H$  NMR (Figure 4S) and FTIR in KBr pellet (Figure 5S). The FTIR spectrum shows a small band at  $3060\text{cm}^{-1}$  and several bands in the region  $1600\text{-}1200\text{ cm}^{-1}$  that correspond to the pyridine groups<sup>6</sup>.

PAA-OsCN was prepared by dissolving 40 mg of  $K_2[Os(CN)_5NO] \cdot H_2O$  and 20  $\mu$ l of  $N_2H_4$  in 5 ml of methanol:water 1:1. Attack of the NO group by hydrazine after 24 hours at room temperature was confirmed by the disappearance of its characteristic visible

absorption band at 420 nm<sup>4</sup>. The solution was mixed with 70 mg of PAA-py dissolved in water and the final pH was set to 6 with acetic acid. The reaction was left to proceed for 3 days at 65°C under Ar atmosphere and the final product was purified by dialysis against NaCl 0.5 M for 2 days, followed by dialysis against MilliQ water for a week.

The identity and purity of the final product was confirmed by <sup>1</sup>H NMR (Figure 4S). The H<sub>a</sub> y H<sub>b</sub> peaks in PAA-py spectra split after Os(CN)<sub>5</sub><sup>3-</sup> coordination to some of the pyridine groups. These observation is consistent with the chemical displacements of aromatic protons in pyridine and [Fe(CN)<sub>5</sub>py]<sup>3-</sup><sup>10, 11</sup>. Additional spectroscopic evidence for the proposed structure is given by the presence of the CN stretching band around 2035 cm<sup>-1</sup> in the FTIR absorption spectra in KBr pellet (Figure 5S) and the MLCT band of the osmium complex at 318 nm ( $\lambda_{\text{MLCT}} = 318 \text{ nm}$  for [Os(CN)<sub>5</sub>py]<sup>3-</sup><sup>1</sup>) in the UV-VIS absorption spectra in water solution.

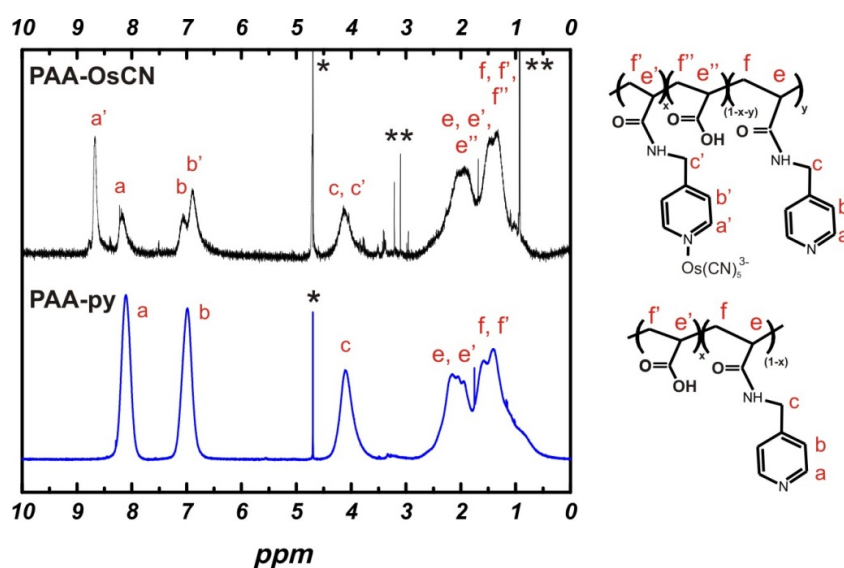

Figure 4S: <sup>1</sup>H NMR spectra for PAA-py and PAA-OsCN. \* HDO/H<sub>2</sub>O (suppressed), \*\* unidentified impurity.

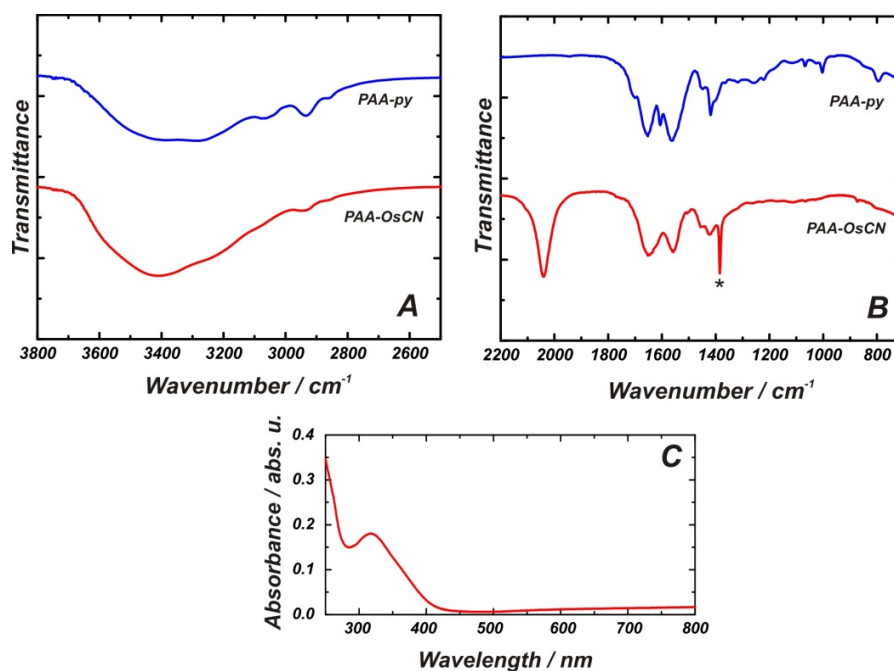

Figure 5S. Transmittance FTIR spectra in KBR pellet for PAA-py and PAA-OsCN in the 3800-2600 cm<sup>-1</sup> (A) and 2200-700 cm<sup>-1</sup> (B) regions. \* NO<sub>3</sub><sup>-</sup> band from HNO<sub>3</sub> used to bring the solution to the final pH (1380 cm<sup>-1</sup>).C. UV-vis spectra for a PAA-OsCN in solution.

**Surface Modification.** Silicon (100) substrates coated with 200 nm gold layer on a 20 nm titanium and 20 nm palladium adhesion layer by thermal evaporation (Edwards Auto 306 vacuum coating system) were employed as electrodes and substrates for ATR-FTIR and XPS spectroscopies.

Electrodes were electrochemically cleaned by potential cycling in 2 M sulfuric acid between 0.2 and 1.6 V at 10 V.s<sup>-1</sup>, followed by one scan at 0.1 V.s<sup>-1</sup> to check for surface contamination and determine the electrochemically active area from the reduction peak of gold oxide<sup>12</sup>. Clean gold film substrates were primed either with sulfonate or amino groups by immersion in a 50 mM MPS solution in H<sub>2</sub>SO<sub>4</sub> 10 mM for 30 min or in 0.1 mg/ml cysteamine in ethanol for 2 hours, respectively.

After thiol adsorption and rinsing with water, the first polyelectrolyte layer was deposited on the thiol-modified Au surface by 15 min dipping in PAH-OsCN or PAA-OsCN solution for Au/MPS and Au/cysteamine, respectively, followed by rinsing with Milli-Q water. The next and subsequent layers were deposited onto the modified

surface by alternate immersion in polyelectrolyte solutions for 15 min and rinsing with Milli-Q water until the desired number of layers was achieved. In the case where HOPG was used as a substrate, multilayer built up was performed on the freshly cleaved surface as described above, employing PAH-OsCN in the first adsorption step.

**Electrochemical Experiments.** Cyclic voltammetry measurements were carried out at room temperature with an Autolab PGSTAT 30 potentiostat (Autolab, Ecochemie, Holland) in a purpose built three electrode Teflon cell, with an electrode exposed area of approximately  $0.25 \text{ cm}^2$  delimited by an inert O-ring. A Ag/AgCl; 3 M KCl (0.210 V vs. NHE) was employed as reference electrode and all electrode potentials herein are quoted with respect to it; a platinum gauze auxiliary electrode of large area was used.

**Attenuated Total Reflection Infrared Spectroscopy:** ATR measurements were performed with a Nicolet Magna 560 FTIR spectrometer equipped with a Spectra-Tech Foundation Thunderdome single reflection ATR Germanium crystal and a MCT-A cryogenic detector. Spectra were acquired with a  $2 \text{ cm}^{-1}$  spectral resolution integrating 1000 interferogram scans.

**X-Ray Photoelectron Spectroscopy.** X-ray Photoelectron Spectroscopy measurements (XPS) were performed under UHV conditions (base pressure  $< 5.10^{-10}$  mbar) in a SPECS UHV spectrometer system equipped with a 150 mm mean radius hemispherical electron energy analyzer and a nine channeltron detector. XPS spectra were acquired at a constant pass energy of 20 eV using an un-monochromated MgK $\alpha$  (1253.6 eV) source operated at 12.5 kV and 20 mA and a detection angle of 30 degrees with respect to the sample normal. Quoted binding energies are referred to the Au 4f $_{7/2}$  emission at 84 eV. Atomic ratios were calculated from the integrated intensities of core levels after instrumental and photoionization cross-section corrections.



## Effect of different cations on the electrochemical response of PAH-OsCN/PVS multilayers

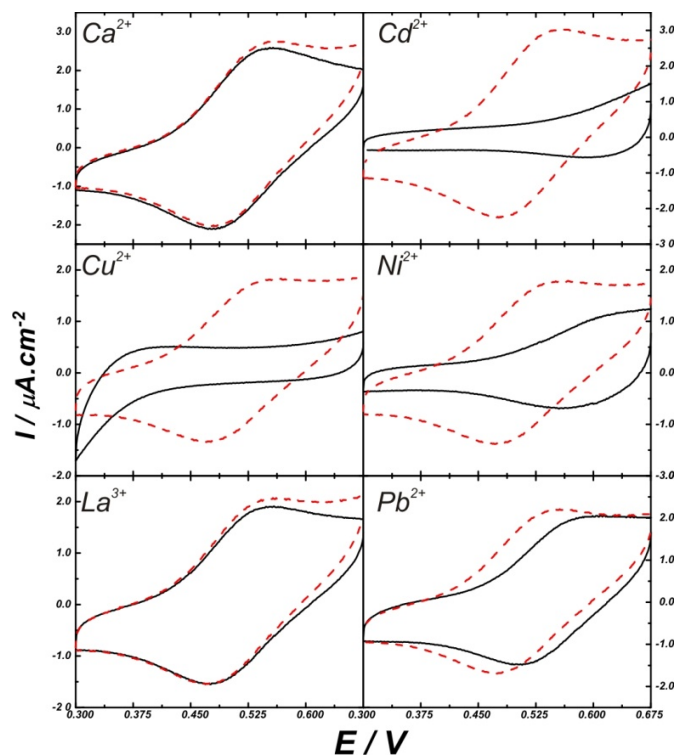

Figure 6S. Effect of different metal ions on the redox response of  $(\text{PAH-OsCN/PVS})_3\text{PAH-OsCN}$  multilayers. Films were immersed for 5 minutes in a 10 mM solution of the metal ion, rinsed with water and tested with CV (black lines). The electrodes were then dipped in EDTA 10 mM for 5 minutes, rinsed and the CV was measured again (red dashed lines). Scan rate:  $50 \text{ mV}\cdot\text{s}^{-1}$ .

**Cyclic Voltammetry experiments for HOPG modified electrodes in a broad electrochemical window.**

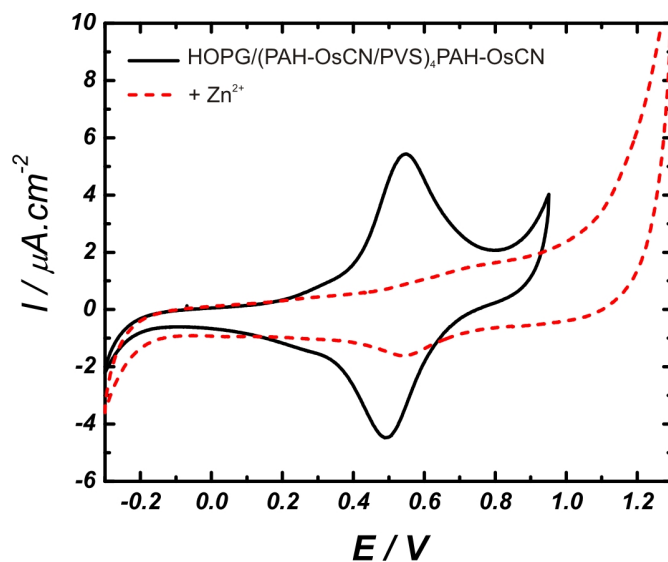

Figure 7S: Cyclic voltammograms for a  $(\text{PAH-OsCN/PVS})_4\text{PAH-OsCN}$  multilayer on HOPG in  $\text{KNO}_3$  0.2 M (black line) and  $\text{KNO}_3$  0.2 M +  $\text{Zn}^{2+}$  1mM (red dashed line). Scan rate:  $50 \text{ mV}\cdot\text{s}^{-1}$ .

## References

1. Slep LD, Baraldo LM, Olabe JA. Synthesis and Electronic Structure of Pentacyanoosmate(II) Complexes with N-Heterocyclic Ligands. *Inorg. Chem.* . 1996;35:6327-6333.
2. Tagliazucchi M, Méndez De Leo L, Cadranel A, Baraldo LM, Völker E, Bonazzola C, Calvo E, Zamlynn V. PM IRRAS spectroelectrochemistry of layer-by-layer self-assembled polyelectrolyte multilayers. *J. Electroanal. Chem.* 2010;In press.
3. Calvo EJ, Etchenique R, Danilowicz C, Diaz L. Electrical Communication between Electrodes and Enzymes Mediated by Redox Hydrogels. *Analytical Chemistry.* 1996;68(23):4186-4193.
4. Baraldo LM, Bessega MS, Rigotti GE, Olabe JA. Crystal and Molecular Structure, Spectroscopic Properties, and Electrophilic Reactivity of Sodium Pentacyanonitrosylosmate(I1) Dihydrate. *Inorg. Chem.* 1994;33:5890-5896.
5. Slep LD, Alborés P, Baraldo LM, Olabe JA. Kinetics and Mechanism of Ligand Interchange in Pentacyano-L-osmate(II) Complexes (L = H<sub>2</sub>O, NH<sub>3</sub>, N-Heterocyclic Ligands). *Inorg. Chem.* 2002;41:114-120.
6. Bonazzola C, Calvo EJ, Nart FC. A Fourier Transform Infrared Reflection-Absorption Spectroscopy Study of Redox Polyelectrolyte Films. *Langmuir.* 2003;19:5279-5286.
7. Tagliazucchi M, Williams FJ, Calvo EJ. Effect of acid-base equilibria on the Donnan Potential of Layer-by-Layer Redox Polyelectrolyte Multilayers. *Journal of Physical Chemistry B.* 2007;111:8105-8113.
8. De Benedetto GE, Guascito MR, Ciriello R, Cataldi TRI. Analysis by X-ray photoelectron spectroscopy of ruthenium stabilised polynuclear hexacyanometallate film electrodes. *Analytica Chimica Acta.* 2000;410(1-2):143-152.
9. Fluck VE, Inoue H, Yanagisawa S. Mössbauer and X-ray Photoelectron Spectroscopic Studies of Prussian Blue and its Related Compounds *Zeitschrift für anorganische und allgemeine Chemie.* 1977;430:241-249.
10. Morando PJ, Bruyère VIE, Blesa MA. Preparation and Spectral Properties of the Sodium Salts of Pentacyano(Ligand)Ferrate(II) Complexes. *Transition Met. Chem.* 1983; 8:99-102.
11. Shepherd RE, Chen Y, Johnson CR. The effect of net charge and backbonding contribution of ML<sub>5</sub> fragments containing Fe(II), Ru(II), Os(II), Co(III) and Rh(III) on the NMR shifts of coordinated N-heterocycles. *Inorganica Chimica Acta.* 1998;267:11-18.

12. Finklea HO, Snider DA, Fedyk J. Passivation of pinholes in octadecanethiol monolayers on gold electrodes by electrochemical polymerization of phenol. *Langmuir*. 1990;6:371.
